# Supplementary material
Source: Springer Nature journal article supplement (https://www.springermedizin.de/resource/supplementary/12889_2013_6558_MOESM1_ESM.pdf/9498518)
Supplement: MOESM1 [file 9498518]

| Percentile of mean<br>temperature | Duration (days) |        |        |
|-----------------------------------|-----------------|--------|--------|
|                                   | 2               | 3      | 4      |
| 98%                               | Red             | Red    | Red    |
| 95%                               | Orange          | Red    | Red    |
| 90%                               | Yellow          | Orange | Orange |

\*Yellow: moderate risk; Orange: high risk; Red: extremely high risk.
